# Supplementary material for: Assembly of hybrids based on polyoxotungstates and Co-tris(imidazolyl) complexes with bifunctional electrocatalytic activities
Source: Royal Society of Chemistry journal article supplement (doi:10.1039/c5ra01165e), 2015-01-01

## Assembly of hybrids based on polyoxotungstates and Co-tris(imidazolyl) complexes with bifunctional electrocatalytic activities

Wanli Zhou,<sup>ab</sup> Jun Peng,<sup>\*a</sup> Zheyu Zhang,<sup>a</sup> Zhenyu Shi,<sup>a</sup> Shifa Ullah Khan,<sup>a</sup>  
Hongsheng Liu<sup>\*c</sup>

<sup>a</sup> Key Laboratory of Polyoxometalate Science of Ministry of Education, Faculty of Chemistry, Northeast Normal University, Changchun, Jilin, 130024, PR China

<sup>b</sup> Faculty of Chemistry, Tonghua Normal University, Tonghua, Jilin, 134002, PR China

<sup>c</sup> School of Chemistry and Chemical Engineering, Daqing Normal University, Daqing, Heilongjiang, 163712, PR China

### Electronic Supplementary Information

#### Table of contents:

1. **Table S1** Selected bond lengths (Å) and angles (°) for compound **1**
2. **Table S2** Selected bond lengths (Å) and angles (°) for compound **2**
3. **Table S3** Selected bond lengths (Å) and angles (°) for compound **3**
4. **Table S4** Hydrogen bonds (Å and °) for compound **3**
5. **Table S5** CAT% data of compounds **1-3** toward reduction of nitrite and oxidation of AA
6. **Fig. S1** IR spectra obtained from compounds **1** (black), **2** (red) and **3** (blue)
7. **Fig. S2** TG curve obtained from compound **1**
8. **Fig. S3** TG curve obtained from compound **2**
9. **Fig. S4** TG curve obtained from compound **3**
10. **Fig. S5** The experimental (red line) and simulated (black line) PXRD patterns obtained from compounds **1-3**
11. **Fig. S6** Consecutive CVs (40 cycles) of (a) **1**-CPE, (b) **2**-CPE and (c) **3**-CPE for reduction of nitrite in 1M H<sub>2</sub>SO<sub>4</sub> + Na<sub>2</sub>SO<sub>4</sub> solutions (pH = 1) with concentration of 8 × 10<sup>-3</sup> mol L<sup>-1</sup> NO<sub>2</sub><sup>-</sup> at the scan rate of 0.10 V·s<sup>-1</sup>.
12. Proposed mechanisms for electrocatalytic reduction of nitrite and oxidation of AA

**Table S1** Selected bond lengths (Å) and angles (°) for compound **1**

|                  |               |                    |               |
|------------------|---------------|--------------------|---------------|
| W(1)-O(12)       | 1.69(4)       | W(4)-O(16)         | 1.90(2)       |
| W(1)-O(1)        | 1.736(19)     | W(4)-O(15)         | 1.92(3)       |
| W(1)-O(11)       | 1.88(3)       | W(4)-O(14)         | 1.93(4)       |
| W(1)-O(8)        | 1.90(2)       | W(4)-O(18)#1       | W(4)- 2.32(3) |
| W(1)-O(7)        | W(1)- 1.90(3) | O(19)#1            | 2.46(4)       |
| O(21)#1          | 2.35(4)       | W(5)-O(5)          | 1.64(2)       |
| W(1)-O(20)#1     | 2.40(4)       | W(5)-O(8)          | 1.86(2)       |
| W(2)-O(2)        | 1.64(2)       | W(5)-O(9)          | 1.88(3)       |
| W(2)-O(13)       | 1.84(3)       | W(5)-O(17)#1       | 1.89(2)       |
| W(2)-O(17)       | 1.87(2)       | W(5)-O(10)         | 1.90(3)       |
| W(2)-O(16)#1     | 1.88(2)       | W(5)-O(20)#1       | 2.32(3)       |
| W(2)-O(12)       | 1.93(3)       | W(5)-O(19)#1       | 2.45(4)       |
| W(2)-O(21)#1     | 2.27(4)       | W(6)-O(6)          | 1.73(2)       |
| W(2)-O(19)       | 2.45(4)       | W(6)-O(15)#1       | 1.85(3)       |
| W(3)-O(3)        | 1.66(2)       | W(6)-O(7)          | 1.85(3)       |
| W(3)-O(13)       | 1.79(3)       | W(6)-O(9)          | 1.89(3)       |
| W(3)-O(11)       | 1.89(3)       | W(6)-O(22)#1       | 1.90(4)       |
| W(3)-O(14)       | 2.06(4)       | W(6)-O(18)         | 2.38(3)       |
| W(3)-O(22)       | 2.07(4)       | W(6)-O(20)#1       | 2.45(4)       |
| W(3)-O(18)#1     | 2.46(3)       | Co(1)-O(1)         | 2.09(2)       |
| W(3)-O(21)#1     | 2.48(4)       | Co(1)-N(1)#2       | 2.11(3)       |
| W(4)-O(4)        | 1.70(2)       | Co(1)-N(5)         | 2.12(2)       |
| W(4)-O(10)       | 1.87(3)       | Co(1)-N(4)#3       | 2.12(3)       |
| B(1)-O(19)       | 1.44(4)       | Co(1)-O(2W)        | 2.15(2)       |
| B(1)-O(21)       | 1.60(3)       | Co(1)-O(1W)        | 2.17(2)       |
| C(1)-C(2)        | 1.37(3)       | C(1)-N(6)          | 1.46(3)       |
| O(12)-W(1)-O(1)  | 109.3(15)     | O(1)-Co(1)-O(1W)   | 84.9(8)       |
| O(1)-W(1)-O(8)   | 97.3(11)      | N(1)#2-Co(1)-O(1W) | 94.0(9)       |
| O(2)-W(2)-O(17)  | 100.0(12)     | N(5)-Co(1)-O(1W)   | 174.6(9)      |
| O(13)-W(2)-O(17) | 84.9(13)      | O(20)-B(1)-O(18)   | 106.9(17)     |

Symmetry transformations used to generate equivalent atoms: #1 -x+1,-y+1,-z+1;  
#2 -x+1,-y-1,-z+2; #3 x+1,y,z; #4 x-1,y,z.

**Table S2** Selected bond lengths (Å) and angles (°) for compound **2**

|              |           |              |               |
|--------------|-----------|--------------|---------------|
| W(1)-O(1)    | 1.677(16) | W(4)-O(16)   | 1.90(2)       |
| W(1)-O(7)    | 1.82(3)   | W(4)-O(15)   | 1.92(3)       |
| W(1)-O(15)#1 | 1.88(3)   | W(4)-O(14)   | 1.93(4)       |
| W(1)-O(9)    | 1.93(3)   | W(4)-O(18)#1 | W(4)- 2.32(3) |
| W(1)-O(23)   | 2.44(3)   | O(19)#1      | 2.46(4)       |
| W(2)-O(2)    | 1.631(18) | W(5)-O(5)    | 1.64(2)       |
| W(2)-O(13)   | 1.77(3)   | W(5)-O(8)    | 1.86(2)       |
| W(2)-O(11)   | 1.83(4)   | W(5)-O(9)    | 1.88(3)       |

|                   |           |                   |           |
|-------------------|-----------|-------------------|-----------|
| W(2)-O(7)#1       | 1.85(3)   | W(5)-O(17)#1      | 1.89(2)   |
| W(2)-O(12)        | 2.11(3)   | W(4)-O(20)        | 2.43(3)   |
| W(2)-O(21)#1      | 2.49(3)   | W(5)-O(5)         | 1.68(2)   |
| W(2)-O(22)#1      | 2.52(3)   | W(5)-O(10)        | 1.85(2)   |
| W(3)-O(3)         | 1.70(2)   | W(5)-O(19)        | 1.868(19) |
| W(3)-O(15)        | 1.89(3)   | W(5)-O(18)        | 1.87(2)   |
| W(3)-O(17)        | 1.91(2)   | W(5)-O(17)        | 1.89(2)   |
| W(3)-O(14)        | 1.920(18) | W(5)-O(23)        | 2.36(3)   |
| W(3)-O(12)        | 1.93(3)   | W(6)-O(6)         | 1.682(19) |
| W(3)-O(22)#1      | 2.27(3)   | W(6)-O(11)        | 1.82(4)   |
| W(3)-O(20)        | 2.43(3)   | W(6)-O(9)         | 1.83(3)   |
| W(4)-O(4)         | 1.71(2)   | W(6)-O(10)        | 1.88(2)   |
| W(4)-O(16)        | 1.87(3)   | W(6)-O(16)#1      | 1.91(3)   |
| W(4)-O(13)#1      | 1.88(3)   | W(6)-O(23)        | 2.44(3)   |
| Si(1)-O(23)       | 1.58(3)   | Co(1)-N(5)        | 2.09(2)   |
| Si(1)-O(20)       | 1.59(3)   | Co(1)-N(1)#2      | 2.09(2)   |
| C(1)-C(2)         | 1.37(3)   | Co(1)-N(4)#3      | 2.12(2)   |
| C(1)-N(6)         | 1.44(3)   | Co(1)-O(1)        | 2.129(17) |
| W(4)-O(18)        | 1.90(2)   | Co(1)-O(1W)       | 2.21(2)   |
| W(4)-O(21)        | 2.31(3)   | Co(1)-O(2W)       | 2.15(2)   |
| O(1)-W(1)-O(7)    | 111.2(13) | O(1)-Co(1)-O(2W)  | 84.0(7)   |
| O(7)-W(1)-O(15)#1 | 91.8(13)  | N(5)-Co(1)-O(1W)  | 174.1(8)  |
| O(2)-W(2)-O(13)   | 112.7(14) | N(5)-Co(1)-O(1W)  | 174.1(8)  |
| O(13)-W(2)-O(11)  | 112.5(13) | O(23)-Si(1)-O(20) | 65.2(15)  |

Symmetry transformations used to generate equivalent atoms: #1 -x,-y+1,-z; #2 -x,-y-1,-z+1; #3 x+1,y,z; #4 x-1,y,z.

**Table S3** Selected bond lengths (Å) and angles (°) for compound **3**

|            |           |            |           |
|------------|-----------|------------|-----------|
| W(1)-O(1)  | 1.746(13) | W(4)-O(33) | 1.967(14) |
| W(1)-O(35) | 1.872(13) | W(4)-O(38) | 2.373(13) |
| W(1)-O(15) | 1.887(13) | W(5)-O(5)  | 1.699(14) |
| W(1)-O(14) | 1.910(14) | W(5)-O(16) | 1.884(14) |
| W(1)-O(13) | 1.925(13) | W(5)-O(17) | 1.904(14) |
| W(2)-O(2)  | 1.724(15) | W(5)-O(36) | 1.920(13) |
| W(2)-O(18) | 1.839(16) | W(4)-O(20) | 2.43(3)   |
| W(2)-O(17) | 1.884(15) | W(5)-O(5)  | 1.68(2)   |
| W(2)-O(19) | 1.919(13) | W(6)-O(6)  | 1.686(17) |
| W(2)-O(14) | 1.933(14) | W(6)-O(11) | 1.868(19) |
| W(2)-O(40) | 2.364(13) | W(6)-O(23) | 1.926(17) |
| W(3)-O(3)  | 1.725(14) | W(6)-O(24) | 1.917(13) |
| W(3)-O(20) | 1.89(3)   | W(6)-O(22) | 1.933(15) |
| W(3)-O(13) | 1.887(13) | W(6)-O(18) | 1.964(16) |
| W(3)-O(19) | 1.896(12) | Co(1)-N(1) | 2.088(15) |
| W(3)-O(21) | 1.948(13) | Co(1)-N(7) | 2.139(18) |

---

|                  |           |                  |           |
|------------------|-----------|------------------|-----------|
| W(3)-O(40)       | 2.380(13) | Co(1)-O(1)       | 2.167(13) |
| W(4)-O(4)        | 1.733(15) | B(1)-O(40)       | 1.49(2)   |
| W(4)-O(15)       | 1.892(13) | B(1)-O(39)       | 1.53(2)   |
| W(4)-O(34)       | 1.913(12) | B(1)-O(37)       | 1.54(2)   |
| W(4)-O(36)       | 1.919(13) | B(1)-O(38)       | 1.55(2)   |
| C(1)-C(2)        | 1.36(3)   | C(1)-N(2)        | 1.45(2)   |
| O(1)-W(1)-O(35)  | 100.0(6)  | N(1)-Co(1)-N(7)  | 93.3(6)   |
| O(35)-W(1)-O(15) | 85.6(6)   | N(1)-Co(1)-O(1)  | 88.6(6)   |
| O(2)-W(2)-O(14)  | 95.1(6)   | N(1)-Co(1)-N(1)  | 180.0(2)  |
| O(17)-W(2)-O(40) | 86.1(5)   | O(40)-B(1)-O(39) | 109.9(15) |

---

Symmetry transformations used to generate equivalent atoms: #1 -x+1,-y,-z+1.

**Table S4** Hydrogen bonds (Å and °) for compound **3**

| D-H...A              | d(D-H) | d(H...A) | d(D...A) | <(DHA) |
|----------------------|--------|----------|----------|--------|
| N2–H2 ... O (5a)     | 0.8607 | 2.5678   | 3.17(2)  | 128.33 |
| N3 – H3 ... O (18b)  | 0.8588 | 2.3843   | 3.19(3)  | 155.75 |
| N4 – H4 ... O (16c)  | 0.8599 | 1.7467   | 2.61(2)  | 177.89 |
| C1 – H1 ... O (19d)  | 0.9347 | 2.4654   | 3.25(3)  | 141.16 |
| C1 – H3 ... O36      | 0.9319 | 2.2151   | 3.05(3)  | 148.30 |
| C5 – H5 ... O(29e)   | 0.9296 | 2.3632   | 2.777(8) | 122.51 |
| C7 – H7 ... O(11e)   | 0.9322 | 2.5460   | 3.43(3)  | 157.93 |
| C8 – H8 ... O(34f)   | 0.9342 | 2.3495   | 3.18(3)  | 148.47 |
| C11 - H11 ... O(1Wc) | 0.9300 | 2.3715   | 3.27(3)  | 162.70 |
| C12 – H12 ... O(2Wg) | 0.9296 | 2.3913   | 3.28(3)  | 161.13 |
| C14 – H14 ... O(38b) | 0.9324 | 1.9083   | 2.78(2)  | 154.42 |
| C14 – H14 ... O(13b) | 0.9324 | 2.5898   | 3.09(3)  | 114.07 |
| C15 – H15 ... O7     | 0.9297 | 2.4705   | 3.23(2)  | 139.16 |
| C15 – H15 ... O30    | 0.9297 | 2.3957   | 3.23(2)  | 150.06 |
| C16 – H16 ... O(1Wc) | 0.9303 | 2.4694   | 3.40(3)  | 174.37 |
| C18 – H18 ... O31    | 0.9304 | 2.4338   | 3.23(3)  | 144.21 |
| C22 – H22 ... O(11e) | 0.9275 | 2.5768   | 3.47(3)  | 160.98 |
| C24- H24 ... O(19d)  | 0.9297 | 2.3980   | 3.26(3)  | 153.97 |
| C25 – H25 ... O(2Wg) | 0.9308 | 2.3587   | 3.28(3)  | 169.78 |
| C29 – H29 ... O(19d) | 0.9290 | 2.3999   | 3.15(3)  | 137.41 |

Symmetry transformations used to generate equivalent atoms: a  $-1+x,y,z$ ; b  $x,y,l+z$ ; c  $1+x,-1+y,z$ ; d  $1-x,-y,-z$ ; e  $-x,l-y,l-z$ ; f  $x,-1+y,z$ ; g  $1-x,-y,l-z$ .

**Table S5** CAT% data of compounds **1-3** toward reduction of nitrite and oxidation of AA

| substrate | CAT%                        | Compound 1 | Compound 2 | Compound 3 |
|-----------|-----------------------------|------------|------------|------------|
| Nitrite   | $2 \times 10^{-3} \text{M}$ | 20         | 18         | 60         |
|           | $4 \times 10^{-3} \text{M}$ | 80         | 45         | 300        |
|           | $6 \times 10^{-3} \text{M}$ | 280        | 82         | 445        |
|           | $8 \times 10^{-3} \text{M}$ | 550        | 100        | 580        |
| AA        | $2 \times 10^{-3} \text{M}$ | 185        | 475        | 14         |
|           | $4 \times 10^{-3} \text{M}$ | 257        | 675        | 28         |
|           | $6 \times 10^{-3} \text{M}$ | 328        | 800        | 67         |
|           | $8 \times 10^{-3} \text{M}$ | 386        | 1150       | 86         |

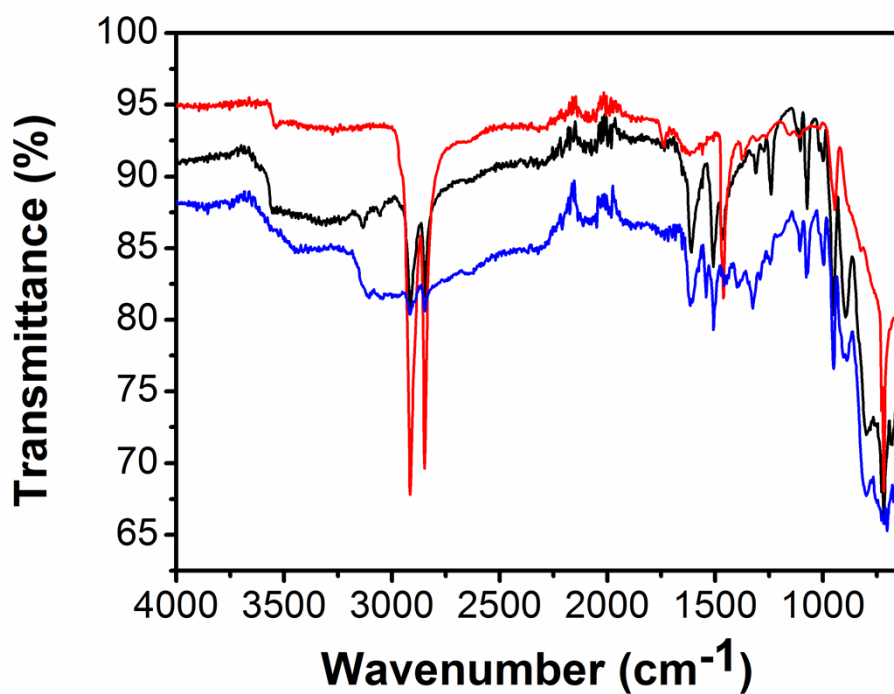

**Fig. S1** IR spectra obtained from compounds **1** (black), **2** (red) and **3** (blue)

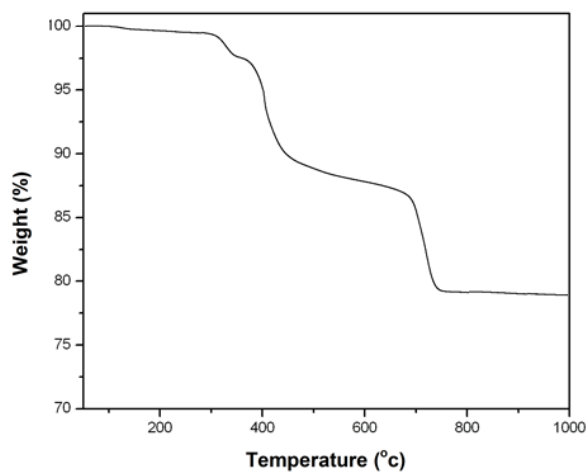

**Fig. S2** TG curve obtained from compound 1

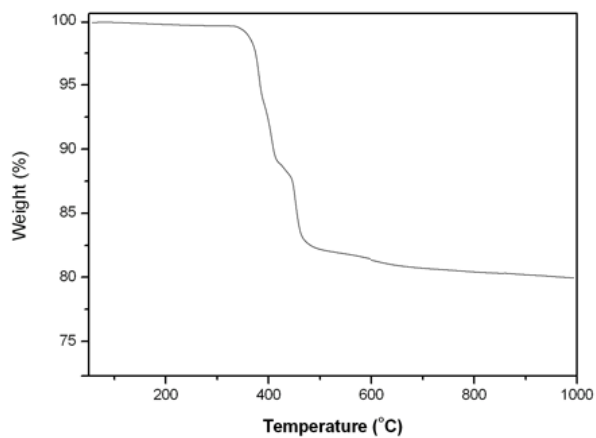

**Fig. S3** TG curve obtained from compound 2

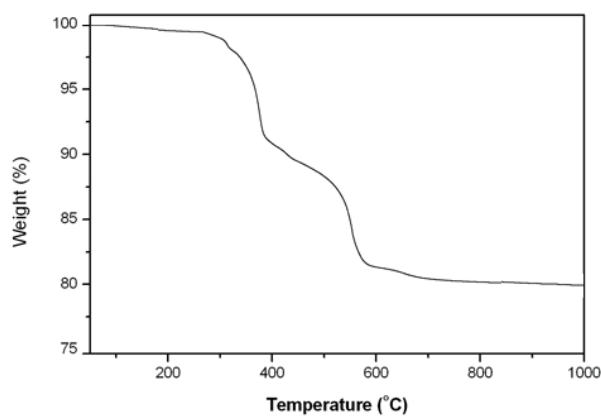

**Fig. S4** TG curve obtained from compound 3

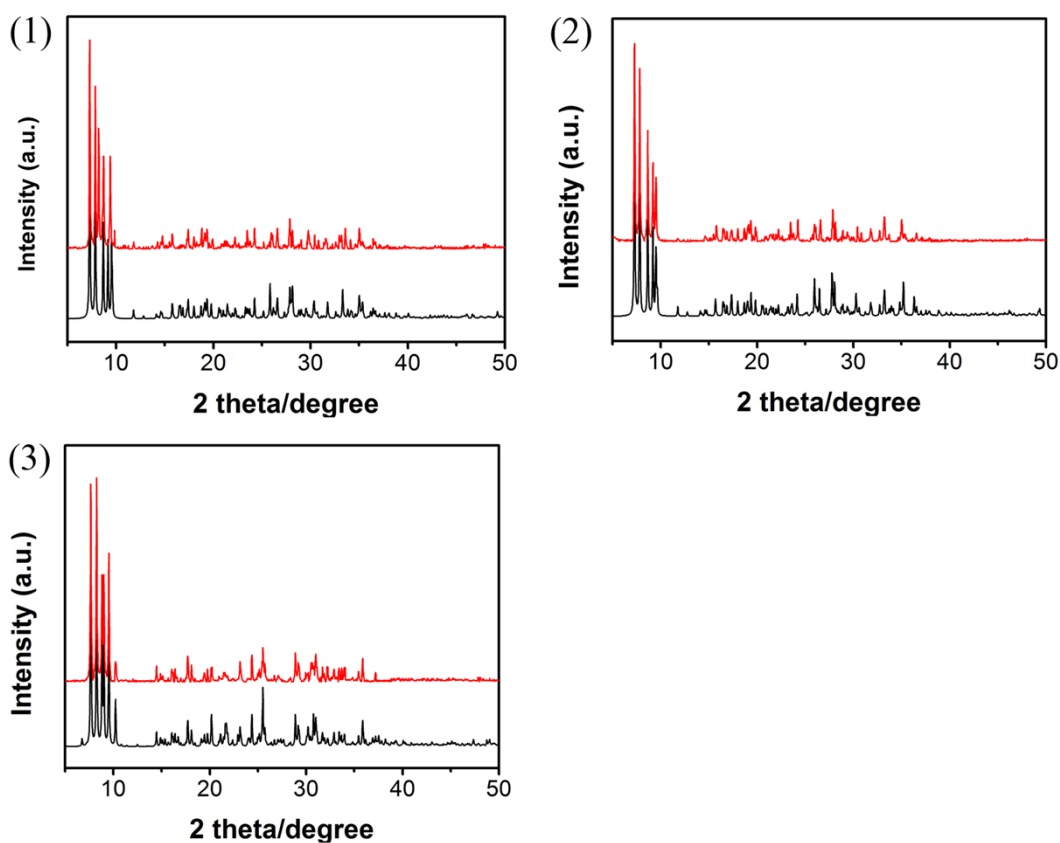

**Fig. S5** The experimental (red line) and simulated (black line) PXRD patterns obtained from compounds **1-3**

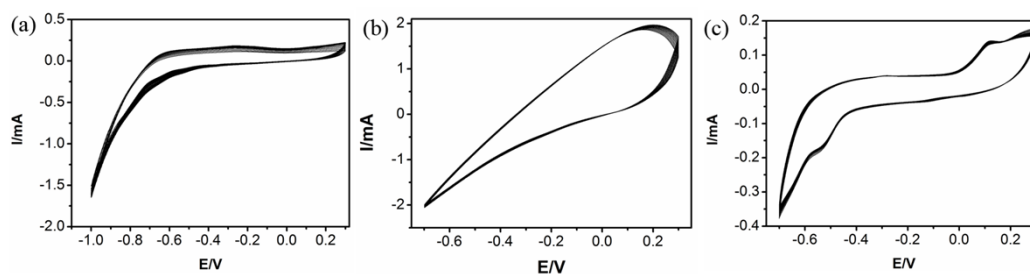

**Fig. S6** Consecutive CVs (40 cycles) of (a) **1-CPE**, (b) **2-CPE** and (c) **3-CPE** for reduction of nitrite in 1M H<sub>2</sub>SO<sub>4</sub> + Na<sub>2</sub>SO<sub>4</sub> solutions (pH = 1) with concentration of  $8 \times 10^{-3}$  mol L<sup>-1</sup> NO<sub>2</sub><sup>-</sup> at the scan rate of 0.10 V · s<sup>-1</sup>.

Proposed mechanisms for electrocatalytic reduction of nitrite by compound **2**:

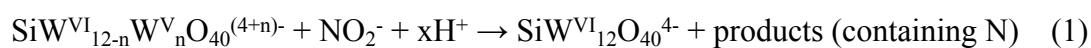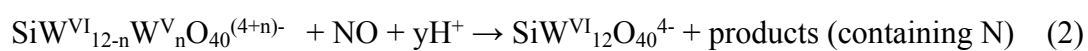

We deduce the oxidation mechanism as follows:

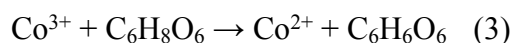

Supplement: c5ra01165e1.pdf [file c5ra01165e1.pdf]
